# Supplementary material
Source: Springer Nature journal article supplement (https://www.springermedizin.de/resource/supplementary/12889_2012_5122_MOESM4_ESM.pdf/9496672)
Supplement: MOESM4 [file 9496672]

Table 3: Selected Socio-demographic variables and availability of latrine among the rural community of Bahir Dar Zuria District, May 2012 (n= 608)

| Variable                                            | Availability of latrine |            | Crude OR<br>(95 % CI) |
|-----------------------------------------------------|-------------------------|------------|-----------------------|
|                                                     | Yes                     | No         |                       |
| <b>Family size:</b>                                 |                         |            |                       |
| = > 5                                               | 273(57.0%)              | 206(43.0%) | 1                     |
| <5                                                  | 82(63.6%)               | 47(36.4%)  | 0.76(0.51-1.14)       |
| <b>Marital status:</b>                              |                         |            |                       |
| Married                                             | 306(56.8%)              | 233(43.2%) | 1.86(0.84-4.12)       |
| Divorce                                             | 27(71.1%)               | 11(28.9%)  | 0.99(0.35-2.83)       |
| Widowed                                             | 22(71.0%)               | 9(29.0%)   | 1                     |
| <b>Educational status of father:</b>                |                         |            |                       |
| Not read & write                                    | 285(57.3%)              | 212(42.7%) | 1                     |
| Literate                                            | 24(57.1%)               | 18(42.9%)  | 1.01(0.53-1.91)       |
| <b>Educational status of mother:</b>                |                         |            |                       |
| Not read & write                                    | 341(58.3%)              | 244(41.7%) | 1                     |
| Literate                                            | 14(60.9%)               | 9(39.1%)   | 0.90(0.38-2.11)       |
| <b>Households with school children</b>              |                         |            |                       |
| Not Educated                                        | 153(60.2%)              | 101(39.8%) | 1                     |
| Primary school and above                            | 202(57.1%)              | 152(42.9%) | 1.14(0.82-1.58)       |
| <b>Income</b>                                       |                         |            |                       |
| <5000 Et.birr per year                              | 109(65.3%)              | 58(34.7%)  | 1                     |
| = >5000 Et birr per year                            | 246(55.8%)              | 195(44.2%) | 1.49(1.03-2.16)*      |
| <b>Frequency of supervision</b>                     |                         |            |                       |
| 1-2 times per month                                 | 211(59.1%)              | 146(40.9%) | 1.38(0.87-2.20)       |
| = >3 times per month                                | 76(51.0%)               | 73(49.0%)  | 1.92(1.14-3.24)*      |
| Never visited                                       | 68(66.7%)               | 34(33.3%)  | 1                     |
| <b>Walking time from home to health institution</b> |                         |            |                       |
| = >30 minutes                                       | 215(62.5%)              | 129(37.5%) | 1                     |
| <30 minutes                                         | 140(53.0%)              | 124(47.0%) | 1.48(1.07-2.04)*      |
| <b>Kebeles accessibility/distance</b>               |                         |            |                       |
| Near -average                                       | 236(55.4%)              | 190(44.6%) | 1                     |
| Too far                                             | 119(65.4%)              | 63(34.6%)  | 0.66(0.46-0.94)*      |

Significant at  $p < 0.05^*$
